# Supplementary material for: Evolutionary Relationships of Wild Hominids Recapitulated by Gut Microbial Communities
Source: PubMed Central journal article supplement (PMC2982803; doi:10.1371/journal.pbio.1000546), 2010-11-16

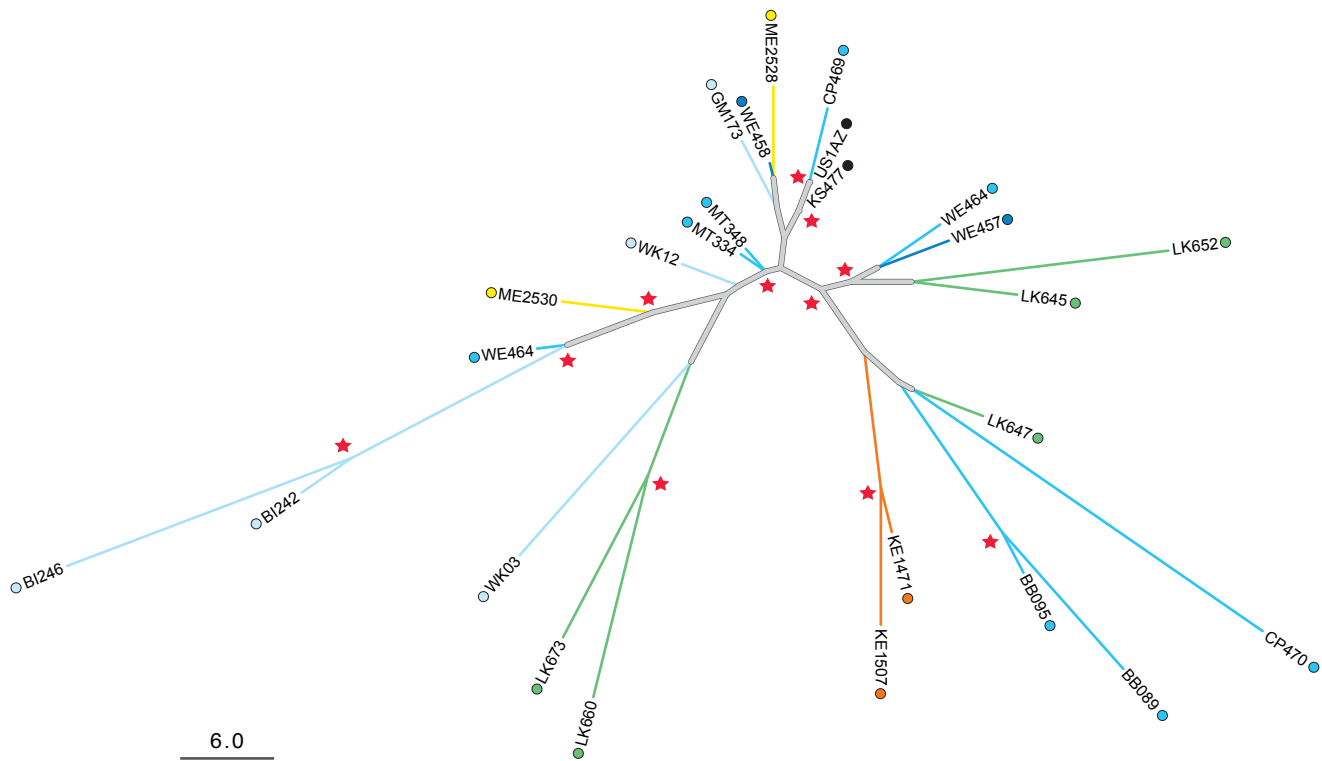

Supplement: pbio.1000546.s003.pdf [file pbio.1000546.s003.pdf]
