# Supplementary material for: Evolutionary Relationships of Wild Hominids Recapitulated by Gut Microbial Communities
Source: PubMed Central journal article supplement (PMC2982803; doi:10.1371/journal.pbio.1000546), 2010-11-16
Supplement: pbio.1000546.s004.pdf [file pbio.1000546.s004.pdf]

**Table S1. Phylum-level Prokaryotic Diversity in Great Ape fecal samples.**

| Phylum             | Sample (see figure 1) |                   |                   |                   |                   |
|--------------------|-----------------------|-------------------|-------------------|-------------------|-------------------|
|                    | US1AZ                 | KS477             | GM173             | BI242             | BI246             |
| A_Euryarchaeota    | 0<br>(0.0E+0)         | 0<br>(0.0E+0)     | 5<br>(9.8E-5)     | 18<br>(7.7E-4)    | 14<br>(8.5E-4)    |
| B_Acidobacteria    | 0<br>(0.0E+0)         | 0<br>(0.0E+0)     | 0<br>(0.0E+0)     | 0<br>(0.0E+0)     | 0<br>(0.0E+0)     |
| B_Actinobacteria   | 944<br>(5.1E-2)       | 55<br>(2.3E-3)    | 2346<br>(4.6E-2)  | 921<br>(4.0E-2)   | 783<br>(4.7E-2)   |
| B_Bacteroidetes    | 1595<br>(8.6E-2)      | 2077<br>(8.8E-2)  | 15130<br>(3.0E-1) | 8226<br>(3.5E-1)  | 1929<br>(1.2E-1)  |
| B_Chlamydiae       | 0<br>(0.0E+0)         | 0<br>(0.0E+0)     | 0<br>(0.0E+0)     | 0<br>(0.0E+0)     | 0<br>(0.0E+0)     |
| B_Chloroflexi      | 0<br>(0.0E+0)         | 0<br>(0.0E+0)     | 2<br>(3.9E-5)     | 0<br>(0.0E+0)     | 0<br>(0.0E+0)     |
| B_Deferribacteres  | 0<br>(0.0E+0)         | 0<br>(0.0E+0)     | 1<br>(2.0E-5)     | 0<br>(0.0E+0)     | 0<br>(0.0E+0)     |
| B_Fibrobacteres    | 0<br>(0.0E+0)         | 0<br>(0.0E+0)     | 67<br>(1.3E-3)    | 0<br>(0.0E+0)     | 0<br>(0.0E+0)     |
| B_Firmicutes       | 11106<br>(6.0E-1)     | 15812<br>(6.7E-1) | 32018<br>(6.3E-1) | 11472<br>(4.9E-1) | 13371<br>(8.1E-1) |
| B_Fusobacteria     | 0<br>(0.0E+0)         | 0<br>(0.0E+0)     | 0<br>(0.0E+0)     | 0<br>(0.0E+0)     | 0<br>(0.0E+0)     |
| B_Gemmatimonadetes | 0<br>(0.0E+0)         | 0<br>(0.0E+0)     | 0<br>(0.0E+0)     | 0<br>(0.0E+0)     | 0<br>(0.0E+0)     |
| B_Lentisphaerae    | 1<br>(5.4E-5)         | 0<br>(0.0E+0)     | 46<br>(9.0E-4)    | 0<br>(0.0E+0)     | 0<br>(0.0E+0)     |
| B_OP10             | 0<br>(0.0E+0)         | 0<br>(0.0E+0)     | 0<br>(0.0E+0)     | 0<br>(0.0E+0)     | 0<br>(0.0E+0)     |
| B_Planctomycetes   | 2<br>(1.1E-4)         | 0<br>(0.0E+0)     | 79<br>(1.6E-3)    | 0<br>(0.0E+0)     | 0<br>(0.0E+0)     |
| B_Proteobacteria   | 4826<br>(2.6E-1)      | 1068<br>(4.5E-2)  | 237<br>(4.7E-3)   | 518<br>(2.2E-2)   | 387<br>(2.3E-2)   |
| B_Spirochaetes     | 2<br>(1.1E-4)         | 0<br>(0.0E+0)     | 145<br>(2.9E-3)   | 2047<br>(8.8E-2)  | 39<br>(2.4E-3)    |
| B_TM7              | 0<br>(0.0E+0)         | 0<br>(0.0E+0)     | 0<br>(0.0E+0)     | 2<br>(8.6E-5)     | 1<br>(6.0E-5)     |
| B_Tenericutes      | 11<br>(5.9E-4)        | 0<br>(0.0E+0)     | 33<br>(6.5E-4)    | 29<br>(1.2E-3)    | 0<br>(0.0E+0)     |
| B_Verrucomicrobia  | 4<br>(2.2E-4)         | 4656<br>(2.0E-1)  | 723<br>(1.4E-2)   | 6<br>(2.6E-4)     | 15<br>(9.1E-4)    |
| Total reads        | 18491                 | 23668             | 50832             | 23239             | 16539             |

Cells contain numbers of classifiable reads (and their frequencies) for a given sample.

**Table S1. Phylum-level Prokaryotic Diversity in Great Ape fecal samples.**

| Phylum             | Sample (see figure 1) |                   |                   |                   |                   |
|--------------------|-----------------------|-------------------|-------------------|-------------------|-------------------|
|                    | WK3                   | WK12              | BB089             | BB095             | MT334             |
| A_Euryarchaeota    | 22<br>(1.2E-3)        | 0<br>(0.0E+0)     | 16<br>(1.8E-4)    | 18<br>(2.1E-4)    | 3<br>(1.1E-4)     |
| B_Acidobacteria    | 4<br>(2.2E-4)         | 1<br>(4.2E-5)     | 9<br>(1.0E-4)     | 36<br>(4.3E-4)    | 1<br>(3.8E-5)     |
| B_Actinobacteria   | 952<br>(5.1E-2)       | 759<br>(3.2E-2)   | 6183<br>(7.0E-2)  | 1481<br>(1.8E-2)  | 502<br>(1.9E-2)   |
| B_Bacteroidetes    | 4236<br>(2.3E-1)      | 10051<br>(4.3E-1) | 32019<br>(3.7E-1) | 26837<br>(3.2E-1) | 7505<br>(2.8E-1)  |
| B_Chlamydiae       | 0<br>(0.0E+0)         | 0<br>(0.0E+0)     | 1<br>(1.1E-5)     | 0<br>(0.0E+0)     | 0<br>(0.0E+0)     |
| B_Chloroflexi      | 0<br>(0.0E+0)         | 0<br>(0.0E+0)     | 2<br>(2.3E-5)     | 0<br>(0.0E+0)     | 0<br>(0.0E+0)     |
| B_Deferribacteres  | 0<br>(0.0E+0)         | 0<br>(0.0E+0)     | 0<br>(0.0E+0)     | 0<br>(0.0E+0)     | 0<br>(0.0E+0)     |
| B_Fibrobacteres    | 0<br>(0.0E+0)         | 0<br>(0.0E+0)     | 50<br>(5.7E-4)    | 377<br>(4.5E-3)   | 20<br>(7.5E-4)    |
| B_Firmicutes       | 12902<br>(7.0E-1)     | 10663<br>(4.5E-1) | 20182<br>(2.3E-1) | 27154<br>(3.2E-1) | 12521<br>(4.7E-1) |
| B_Fusobacteria     | 0<br>(0.0E+0)         | 0<br>(0.0E+0)     | 0<br>(0.0E+0)     | 0<br>(0.0E+0)     | 0<br>(0.0E+0)     |
| B_Gemmatimonadetes | 0<br>(0.0E+0)         | 0<br>(0.0E+0)     | 2<br>(2.3E-5)     | 0<br>(0.0E+0)     | 0<br>(0.0E+0)     |
| B_Lentisphaerae    | 0<br>(0.0E+0)         | 0<br>(0.0E+0)     | 1<br>(1.1E-5)     | 0<br>(0.0E+0)     | 8<br>(3.0E-4)     |
| B_OP10             | 0<br>(0.0E+0)         | 0<br>(0.0E+0)     | 22<br>(2.5E-4)    | 0<br>(0.0E+0)     | 0<br>(0.0E+0)     |
| B_Planctomycetes   | 0<br>(0.0E+0)         | 0<br>(0.0E+0)     | 12<br>(1.4E-4)    | 3<br>(3.6E-5)     | 15<br>(5.7E-4)    |
| B_Proteobacteria   | 242<br>(1.3E-2)       | 1954<br>(8.3E-2)  | 28818<br>(3.3E-1) | 28030<br>(3.3E-1) | 5567<br>(2.1E-1)  |
| B_Spirochaetes     | 3<br>(1.6E-4)         | 0<br>(0.0E+0)     | 59<br>(6.7E-4)    | 172<br>(2.0E-3)   | 62<br>(2.3E-3)    |
| B_TM7              | 0<br>(0.0E+0)         | 0<br>(0.0E+0)     | 21<br>(2.4E-4)    | 5<br>(5.9E-5)     | 0<br>(0.0E+0)     |
| B_Tenericutes      | 70<br>(3.8E-3)        | 85<br>(3.6E-3)    | 6<br>(6.8E-5)     | 50<br>(5.9E-4)    | 71<br>(2.7E-3)    |
| B_Verrucomicrobia  | 62<br>(3.4E-3)        | 19<br>(8.1E-4)    | 301<br>(3.4E-3)   | 81<br>(9.6E-4)    | 251<br>(9.5E-3)   |
| Total reads        | 18493                 | 23532             | 87704             | 84244             | 26526             |

Cells contain numbers of classifiable reads (and their frequencies) for a given sample.

**Table S1. Phylum-level Prokaryotic Diversity in Great Ape fecal samples.**

| Phylum             | Sample (see figure 1) |                  |                   |                   |                   |
|--------------------|-----------------------|------------------|-------------------|-------------------|-------------------|
|                    | MT348                 | WE464            | CP469             | CP470             | WE457             |
| A_Euryarchaeota    | 2<br>(5.6E-5)         | 3<br>(2.0E-4)    | 0<br>(0.0E+0)     | 11<br>(1.2E-4)    | 30<br>(4.2E-4)    |
| B_Acidobacteria    | 3<br>(8.4E-5)         | 6<br>(4.1E-4)    | 0<br>(0.0E+0)     | 8<br>(8.5E-5)     | 10<br>(1.4E-4)    |
| B_Actinobacteria   | 126<br>(3.5E-3)       | 192<br>(1.3E-2)  | 845<br>(3.0E-2)   | 12632<br>(1.3E-1) | 387<br>(5.4E-3)   |
| B_Bacteroidetes    | 7612<br>(2.1E-1)      | 4219<br>(2.9E-1) | 4842<br>(1.7E-1)  | 28857<br>(3.1E-1) | 13861<br>(1.9E-1) |
| B_Chlamydiae       | 0<br>(0.0E+0)         | 0<br>(0.0E+0)    | 0<br>(0.0E+0)     | 0<br>(0.0E+0)     | 0<br>(0.0E+0)     |
| B_Chloroflexi      | 1<br>(2.8E-5)         | 0<br>(0.0E+0)    | 0<br>(0.0E+0)     | 22<br>(2.3E-4)    | 0<br>(0.0E+0)     |
| B_Deferribacteres  | 0<br>(0.0E+0)         | 0<br>(0.0E+0)    | 0<br>(0.0E+0)     | 1<br>(1.1E-5)     | 1<br>(1.4E-5)     |
| B_Fibrobacteres    | 43<br>(1.2E-3)        | 0<br>(0.0E+0)    | 15<br>(5.4E-4)    | 84<br>(8.9E-4)    | 11<br>(1.5E-4)    |
| B_Firmicutes       | 26201<br>(7.3E-1)     | 9054<br>(6.1E-1) | 21441<br>(7.7E-1) | 49326<br>(5.2E-1) | 16027<br>(2.2E-1) |
| B_Fusobacteria     | 0<br>(0.0E+0)         | 56<br>(3.8E-3)   | 0<br>(0.0E+0)     | 0<br>(0.0E+0)     | 0<br>(0.0E+0)     |
| B_Gemmatimonadetes | 0<br>(0.0E+0)         | 0<br>(0.0E+0)    | 0<br>(0.0E+0)     | 0<br>(0.0E+0)     | 0<br>(0.0E+0)     |
| B_Lentisphaerae    | 212<br>(5.9E-3)       | 0<br>(0.0E+0)    | 31<br>(1.1E-3)    | 193<br>(2.0E-3)   | 1<br>(1.4E-5)     |
| B_OP10             | 0<br>(0.0E+0)         | 0<br>(0.0E+0)    | 0<br>(0.0E+0)     | 0<br>(0.0E+0)     | 0<br>(0.0E+0)     |
| B_Planctomycetes   | 48<br>(1.3E-3)        | 2<br>(1.4E-4)    | 0<br>(0.0E+0)     | 0<br>(0.0E+0)     | 0<br>(0.0E+0)     |
| B_Proteobacteria   | 768<br>(2.1E-2)       | 1006<br>(6.8E-2) | 192<br>(6.9E-3)   | 593<br>(6.3E-3)   | 41728<br>(5.8E-1) |
| B_Spirochaetes     | 830<br>(2.3E-2)       | 1<br>(6.8E-5)    | 223<br>(8.0E-3)   | 2177<br>(2.3E-2)  | 80<br>(1.1E-3)    |
| B_TM7              | 0<br>(0.0E+0)         | 0<br>(0.0E+0)    | 0<br>(0.0E+0)     | 11<br>(1.2E-4)    | 0<br>(0.0E+0)     |
| B_Tenericutes      | 0<br>(0.0E+0)         | 197<br>(1.3E-2)  | 52<br>(1.9E-3)    | 82<br>(8.7E-4)    | 84<br>(1.2E-3)    |
| B_Verrucomicrobia  | 55<br>(1.5E-3)        | 26<br>(1.8E-3)   | 119<br>(4.3E-3)   | 332<br>(3.5E-3)   | 6<br>(8.3E-5)     |
| Total reads        | 35901                 | 14762            | 27760             | 94329             | 72226             |

Cells contain numbers of classifiable reads (and their frequencies) for a given sample.

**Table S1. Phylum-level Prokaryotic Diversity in Great Ape fecal samples.**

| Phylum             | Sample (see figure 1) |                   |                   |                   |                   |
|--------------------|-----------------------|-------------------|-------------------|-------------------|-------------------|
|                    | WE458                 | LK645             | LK647             | LK652             | LK660             |
| A_Euryarchaeota    | 23<br>(1.3E-4)        | 9<br>(3.3E-4)     | 7<br>(2.7E-4)     | 29<br>(1.4E-3)    | 82<br>(2.9E-3)    |
| B_Acidobacteria    | 0<br>(0.0E+0)         | 0<br>(0.0E+0)     | 2<br>(7.6E-5)     | 3<br>(1.5E-4)     | 3<br>(1.1E-4)     |
| B_Actinobacteria   | 1805<br>(1.0E-2)      | 3021<br>(1.1E-1)  | 894<br>(3.4E-2)   | 2519<br>(1.2E-1)  | 1527<br>(5.5E-2)  |
| B_Bacteroidetes    | 34123<br>(1.9E-1)     | 4254<br>(1.6E-1)  | 5212<br>(2.0E-1)  | 4701<br>(2.3E-1)  | 6156<br>(2.2E-1)  |
| B_Chlamydiae       | 0<br>(0.0E+0)         | 0<br>(0.0E+0)     | 0<br>(0.0E+0)     | 0<br>(0.0E+0)     | 0<br>(0.0E+0)     |
| B_Chloroflexi      | 0<br>(0.0E+0)         | 0<br>(0.0E+0)     | 0<br>(0.0E+0)     | 1<br>(4.9E-5)     | 4<br>(1.4E-4)     |
| B_Deferribacteres  | 0<br>(0.0E+0)         | 0<br>(0.0E+0)     | 0<br>(0.0E+0)     | 0<br>(0.0E+0)     | 0<br>(0.0E+0)     |
| B_Fibrobacteres    | 0<br>(0.0E+0)         | 170<br>(6.2E-3)   | 0<br>(0.0E+0)     | 66<br>(3.2E-3)    | 154<br>(5.5E-3)   |
| B_Firmicutes       | 56825<br>(3.2E-1)     | 19024<br>(7.0E-1) | 18879<br>(7.2E-1) | 12944<br>(6.3E-1) | 19585<br>(7.0E-1) |
| B_Fusobacteria     | 3<br>(1.7E-5)         | 0<br>(0.0E+0)     | 0<br>(0.0E+0)     | 0<br>(0.0E+0)     | 0<br>(0.0E+0)     |
| B_Gemmatimonadetes | 2<br>(1.1E-5)         | 0<br>(0.0E+0)     | 0<br>(0.0E+0)     | 0<br>(0.0E+0)     | 0<br>(0.0E+0)     |
| B_Lentisphaerae    | 8<br>(4.5E-5)         | 1<br>(3.7E-5)     | 0<br>(0.0E+0)     | 15<br>(7.3E-4)    | 9<br>(3.2E-4)     |
| B_OP10             | 0<br>(0.0E+0)         | 0<br>(0.0E+0)     | 0<br>(0.0E+0)     | 0<br>(0.0E+0)     | 0<br>(0.0E+0)     |
| B_Planctomycetes   | 1<br>(5.6E-6)         | 0<br>(0.0E+0)     | 0<br>(0.0E+0)     | 0<br>(0.0E+0)     | 0<br>(0.0E+0)     |
| B_Proteobacteria   | 83840<br>(4.7E-1)     | 195<br>(7.1E-3)   | 732<br>(2.8E-2)   | 67<br>(3.3E-3)    | 158<br>(5.7E-3)   |
| B_Spirochaetes     | 50<br>(2.8E-4)        | 236<br>(8.6E-3)   | 117<br>(4.5E-3)   | 40<br>(1.9E-3)    | 80<br>(2.9E-3)    |
| B_TM7              | 3<br>(1.7E-5)         | 0<br>(0.0E+0)     | 0<br>(0.0E+0)     | 1<br>(4.9E-5)     | 7<br>(2.5E-4)     |
| B_Tenericutes      | 1430<br>(8.0E-3)      | 130<br>(4.8E-3)   | 166<br>(6.3E-3)   | 74<br>(3.6E-3)    | 77<br>(2.8E-3)    |
| B_Verrucomicrobia  | 360<br>(2.0E-3)       | 290<br>(1.1E-2)   | 251<br>(9.6E-3)   | 79<br>(3.8E-3)    | 93<br>(3.3E-3)    |
| Total reads        | 178473                | 27330             | 26260             | 20539             | 27935             |

Cells contain numbers of classifiable reads (and their frequencies) for a given sample.

**Table S1. Phylum-level Prokaryotic Diversity in Great Ape fecal samples.**

| Phylum             | Sample (see figure 1) |                   |                   |                   |                   |
|--------------------|-----------------------|-------------------|-------------------|-------------------|-------------------|
|                    | LK673                 | ME2528            | ME2530            | KE1471            | KE1507            |
| A_Euryarchaeota    | 15<br>(5.4E-4)        | 0<br>(0.0E+0)     | 0<br>(0.0E+0)     | 5<br>(1.3E-4)     | 1<br>(3.5E-5)     |
| B_Acidobacteria    | 2<br>(7.2E-5)         | 1<br>(3.2E-5)     | 1<br>(3.4E-5)     | 1<br>(2.5E-5)     | 1<br>(3.5E-5)     |
| B_Actinobacteria   | 741<br>(2.7E-2)       | 803<br>(2.6E-2)   | 411<br>(1.4E-2)   | 510<br>(1.3E-2)   | 1318<br>(4.6E-2)  |
| B_Bacteroidetes    | 4306<br>(1.5E-1)      | 11810<br>(3.8E-1) | 15352<br>(5.2E-1) | 13176<br>(3.3E-1) | 10578<br>(3.7E-1) |
| B_Chlamydiae       | 0<br>(0.0E+0)         | 0<br>(0.0E+0)     | 0<br>(0.0E+0)     | 0<br>(0.0E+0)     | 0<br>(0.0E+0)     |
| B_Chloroflexi      | 5<br>(1.8E-4)         | 1<br>(3.2E-5)     | 0<br>(0.0E+0)     | 2<br>(5.0E-5)     | 0<br>(0.0E+0)     |
| B_Deferribacteres  | 0<br>(0.0E+0)         | 0<br>(0.0E+0)     | 0<br>(0.0E+0)     | 0<br>(0.0E+0)     | 0<br>(0.0E+0)     |
| B_Fibrobacteres    | 81<br>(2.9E-3)        | 0<br>(0.0E+0)     | 1<br>(3.4E-5)     | 1<br>(2.5E-5)     | 2<br>(7.0E-5)     |
| B_Firmicutes       | 22313<br>(8.0E-1)     | 2092<br>(6.7E-2)  | 954<br>(3.3E-2)   | 4439<br>(1.1E-1)  | 2506<br>(8.8E-2)  |
| B_Fusobacteria     | 0<br>(0.0E+0)         | 1<br>(3.2E-5)     | 0<br>(0.0E+0)     | 1<br>(2.5E-5)     | 0<br>(0.0E+0)     |
| B_Gemmatimonadetes | 0<br>(0.0E+0)         | 0<br>(0.0E+0)     | 0<br>(0.0E+0)     | 0<br>(0.0E+0)     | 0<br>(0.0E+0)     |
| B_Lentisphaerae    | 49<br>(1.8E-3)        | 0<br>(0.0E+0)     | 1<br>(3.4E-5)     | 0<br>(0.0E+0)     | 0<br>(0.0E+0)     |
| B_OP10             | 0<br>(0.0E+0)         | 0<br>(0.0E+0)     | 1<br>(3.4E-5)     | 0<br>(0.0E+0)     | 0<br>(0.0E+0)     |
| B_Planctomycetes   | 0<br>(0.0E+0)         | 0<br>(0.0E+0)     | 9<br>(3.1E-4)     | 1<br>(2.5E-5)     | 1<br>(3.5E-5)     |
| B_Proteobacteria   | 230<br>(8.2E-3)       | 16694<br>(5.3E-1) | 12554<br>(4.3E-1) | 21648<br>(5.4E-1) | 14174<br>(5.0E-1) |
| B_Spirochaetes     | 56<br>(2.0E-3)        | 3<br>(9.5E-5)     | 6<br>(2.0E-4)     | 108<br>(2.7E-3)   | 15<br>(5.2E-4)    |
| B_TM7              | 1<br>(3.6E-5)         | 1<br>(3.2E-5)     | 0<br>(0.0E+0)     | 2<br>(5.0E-5)     | 0<br>(0.0E+0)     |
| B_Tenericutes      | 36<br>(1.3E-3)        | 12<br>(3.8E-4)    | 5<br>(1.7E-4)     | 66<br>(1.7E-3)    | 13<br>(4.5E-4)    |
| B_Verrucomicrobia  | 120<br>(4.3E-3)       | 13<br>(4.1E-4)    | 8<br>(2.7E-4)     | 16<br>(4.0E-4)    | 9<br>(3.1E-4)     |
| Total reads        | 27955                 | 31431             | 29303             | 39976             | 28618             |

Cells contain numbers of classifiable reads (and their frequencies) for a given sample.
